# Supplementary material
Source: Research Square preprint supplement (doi:10.21203/rs.3.rs-9727097/v1)

## Survey: Acceptability of the malaria vaccine in the Nanoro health district

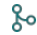

To date, two malaria vaccines, RTS,S/AS01 and R21/Matrix M, have been approved by the World Health Organization for use in endemic countries to prevent malaria in children. On 5 February 2024, the government of Burkina Faso has introduced one of these two vaccines into its Expanded Programme on Immunisation, targeting children aged between 5 and 17 months. Due to limited vaccine doses, only 27 priority districts out of a total of 70 are currently deploying the vaccine. However, for malaria vaccination to be a success, one important criterion must be met: public acceptance of the vaccine. Health workers are one of the main sources of information for parents when deciding whether or not to have their children vaccinated.

The aim of this study is to assess the acceptance of malaria vaccine among health workers in the Nanoro health district and to identify potential barriers and facilitating factors for malaria vaccination in these groups. The results of this study will be used to draw up a communication plan to support the vaccination currently underway in the 27 districts, and its extension to the remaining 43 districts in the country.

All health workers aged 18 and over, currently employed in the public or private health sector in the Nanoro health district, are eligible for this study. However, only health workers willing to respond to the survey were eligible. The questionnaire will take part in the study. We will be asking them a few questions about their views on the malaria vaccine.

The questionnaire will be anonymous and all personal identification data will remain confidential. Only the aggregated and anonymous results of the study will be communicated to the Nanoro health district and to the participants, and to the Ministry of Health and Public Hygiene of Burkina Faso. You will not be indirectly identifiable and your individual responses will not be intentionally or accidentally shared with anyone. If you decide not to take part in the study, there will be no negative consequences. If you decide to take part in the study, you can stop doing so at any time, without any negative consequences.

Your participation in this study is entirely voluntary and you will not receive any remuneration for your participation. However, you will be granted compensation to cover your Internet connection costs (1 GB). By agreeing to take part in the study, you agree to complete the questionnaire. Completing the questionnaire will take approximately 10 to 15 minutes. Please complete the questionnaire before 11.45pm on 05 May 2025.

If you have any questions, please contact Dr Jean-Vincent LAMIEN, Tel (WhatsApp): +226 74 49 99 86, or Email [dofindoubel@gmail.com](mailto:dofindoubel@gmail.com) Tel: +226 25 48 89 37; or the Burkina Health Research Ethics Committee (CERS), Tel: +226 25 48 89 37.

### INFORMED CONSENT OF THE PARTICIPANT

1. understand and agree to answer the questionnaire. \*

Yes

No

## SOCIO-DEMOGRAPHIC INFORMATION

2. How old are you, in years? \*

< 18

18-29

30-39

40-49

50-59

≥ 60

3. What is your gender? \*

Male

Female

4. What is your highest level of education? \*

Certificate of Primary Education (CEP)

Brevet d'Etudes du Premier Cycle (BEPC)

Baccalauréat (BAC)

Bachelor's

degree

Master's

degree

Doctorate

Other

5. What is your current occupation? \*

- Doctor
- Pharmacist  Health  
attaché  Nurse
- Midwife or state-qualified midwife   
Pharmacist's assistant
- Itinerant Community Health and Hygiene Agent (AIS)   
Laboratory technician
- Other

6. What is your professional experience, in years? \*

- ≤ 5
- 6-10
- 11-15
- 16-20
- > 20

7. What type of health facility do you work in? \*

- Medical Centre with Surgical Unit (CMA)   
Medical Centre (CM)
- Health and Social Promotion Centre (CSPS)   
Nanoro Clinical Research Unit (URCN)
- Other

8. Is the health facility where you work public (state-run) or private (faith-based, for-profit or not-for-profit)? \*

Public

Private

9. What is your religion? \*

Christianity

Islam

Animism

Other

## KNOWLEDGE AND PERCEPTIONS OF MALARIA VACCINES

10. Are you aware of the inclusion of a malaria vaccine in the country's Expanded Programme on Immunisation (EPI)? \*

Yes

No

11. Are you aware of the integration of a malaria vaccine into the routine immunisation programme in the Nanoro health district? \*

Yes

No

12. Which malaria vaccine has been introduced in the Nanoro health district? \*

RTS,S/AS01

R21/Matrix M

Don't know

13. What is the malaria vaccination schedule recommended in the Expanded Programme on Immunisation (EPI)? \*

3 doses at 2, 3 and 4 months after birth.

3 doses at 2, 4 and 18 months after birth.

4 doses at 5, 6, 7 and 15 months after birth.

4 doses at 2, 3, 4 and 18 months after birth.

don't know.

14. Did you receive any training before the introduction of the malaria vaccine in the Nanoro health district? \*

Yes

No

Not applicable

15. Have you ever given malaria vaccine to children as part of the Expanded Programme on Immunization? \*

Yes

No

16. Please indicate your level of agreement with the following statements (1 - Strongly agree, 2 - Agree, 3 - Neither agree nor disagree, 4 - Disagree, 5 - Strongly disagree). \*

|                                                                                                                               | I totally agree       | Agreed.               | Neither agree nor disagree | In disagreement       | Totally disagree      |
|-------------------------------------------------------------------------------------------------------------------------------|-----------------------|-----------------------|----------------------------|-----------------------|-----------------------|
| Vaccination against malaria can protect children aged 5 to 17 months against infection by Plasmodi um.                        | <input type="radio"/> | <input type="radio"/> | <input type="radio"/>      | <input type="radio"/> | <input type="radio"/> |
| Vaccination against malaria can protect older children from 5 to 17 months against severe forms of the disease.               | <input type="radio"/> | <input type="radio"/> | <input type="radio"/>      | <input type="radio"/> | <input type="radio"/> |
| Vaccination against malaria is the <b>only means</b> of protecting children aged 5 to 17 months against Plasmodium infection. | <input type="radio"/> | <input type="radio"/> | <input type="radio"/>      | <input type="radio"/> | <input type="radio"/> |
| One of the ways to prevent malaria in children aged between 5 and 17 months vaccination against illness.                      | <input type="radio"/> | <input type="radio"/> | <input type="radio"/>      | <input type="radio"/> | <input type="radio"/> |
| Vaccination against malaria do is of no interest to children aged between 5 and 17 months.                                    | <input type="radio"/> | <input type="radio"/> | <input type="radio"/>      | <input type="radio"/> | <input type="radio"/> |

17. Please indicate your level of agreement with the following statements (1 - Strongly agree, 2 - Agree, 3 - Neither agree nor disagree, 4 - Disagree, 5 - Strongly disagree). \*

|                                                                                                           | I totally agree       | Agreed.               | Neither agree nor disagree | In disagreement       | Totally disagree      |
|-----------------------------------------------------------------------------------------------------------|-----------------------|-----------------------|----------------------------|-----------------------|-----------------------|
| I'm concerned about the safety of the vaccine against malaria.                                            | <input type="radio"/> | <input type="radio"/> | <input type="radio"/>      | <input type="radio"/> | <input type="radio"/> |
| I'm afraid that vaccination against malaria may have an impact on serious side effects.                   | <input type="radio"/> | <input type="radio"/> | <input type="radio"/>      | <input type="radio"/> | <input type="radio"/> |
| I think the others methods for preventing malaria are much better than vaccination.                       | <input type="radio"/> | <input type="radio"/> | <input type="radio"/>      | <input type="radio"/> | <input type="radio"/> |
| Children can still contract malaria even after having been vaccinated against the disease.                | <input type="radio"/> | <input type="radio"/> | <input type="radio"/>      | <input type="radio"/> | <input type="radio"/> |
| Children don't need the vaccine against malaria, because there are treatments effective for this disease. | <input type="radio"/> | <input type="radio"/> | <input type="radio"/>      | <input type="radio"/> | <input type="radio"/> |

## ATTITUDES AND BEHAVIOUR TOWARDS MALARIA VACCINATION

18. Do you have children (one or more)? \*

Yes

No

19. Have any of your children ever tested positive for malaria? \*

Yes, confirmed malaria

Yes, suspected malaria  No

I don't know

20. Would you recommend that your own children and the children of family members or friends be vaccinated against malaria? \*

Yes

No

I'm not sure

21. If you answered "no" or "not sure" to the previous question, what might be the reasons? (Please tick all that apply) \*

I don't think the vaccine is safe.

I don't think the vaccine is effective in preventing malaria.  I don't have

enough information about the vaccine.

I've had negative experiences with vaccines.

My religion is opposed to vaccines.

I don't trust the government.  Other

22. Would you recommend that your patients have their children vaccinated against malaria? \*

Yes

No

I'm not sure

23. If you answered "no" or "not sure" to the previous question, what might be the reasons for this?

I don't think the vaccine is safe

I don't think the vaccine is effective in preventing malaria.  I don't have enough information about the vaccine.

I've had negative experiences with vaccines.

My religion is opposed to vaccines.

I don't trust the government.  Other

24. Do you meet parents who are reluctant to have their children vaccinated against malaria? \*

Yes

No

Not applicable

25. If you met parents who were hesitant, would you feel comfortable addressing their concerns? \*

Yes

No

I'm not sure

26. What do you think are the most common reasons why some parents are reluctant to have their children vaccinated against malaria? (Please tick all that apply) \*.

Vaccine safety

Vaccine efficacy

Fear of new vaccines

Disinformation

Need for other preventive measures  Don't know

Other

27. Classify your sources of information about malaria vaccine and vaccination (please rank sources from most to least frequent). \*

Social media (WhatsApp, Facebook, TikTok, LinkedIn, X, Instagram)

Radio, television, newspapers

Scientific journals

Place of work

Colleagues

The Ministry of Health website

World Health Organisation website

28. Communication with the public is essential when introducing a new vaccine. In your opinion, what are the key messages to be conveyed (please tick all that apply)?

How can malaria be prevented?

How effective will the malaria vaccine be in preventing future plasmodium infections?  What is the safety profile of the malaria vaccine?

Are there any risks to children from the malaria vaccine?  What are the benefits of the malaria vaccine?

Are other malaria prevention measures needed in addition to the vaccine?  Other

29. In your opinion, what are the sources most consulted by the public for communicating and raising awareness of malaria vaccination and related information? (Please rank the sources from the most frequent to the least frequent). \*

|                                                     |
|-----------------------------------------------------|
| Direct advice or health promotion                   |
| Newspapers                                          |
| Radio                                               |
| Television                                          |
| WhatsApp                                            |
| Facebook                                            |
| Other social media (TikTok, Instagram, LinkedIn, X) |
| Posters/leaflets/brochures                          |
| The Ministry of Health website                      |
| World Health Organisation website                   |

### CONFIDENCE IN GOVERNMENT AND PERSONAL OPINION ON THE IMPACT OF VACCINATION

30. Please indicate your level of agreement with the following statements (1- Strongly agree, 2- Agree, 3- Neither agree nor disagree, 4- Disagree, 5- Strongly disagree). \*

|                                                                                                                                                                        | I totally agree       | Agreed.               | Neither agree nor disagree | In disagreement       | Totally disagree      |
|------------------------------------------------------------------------------------------------------------------------------------------------------------------------|-----------------------|-----------------------|----------------------------|-----------------------|-----------------------|
| Le government provides information transparent and up-to-date on the vaccine development against malaria and its integration into the Programme Elargi de Vaccination. | <input type="radio"/> | <input type="radio"/> | <input type="radio"/>      | <input type="radio"/> | <input type="radio"/> |
| Le government is offering health a training on vaccines antimalarial drugs and vaccination.                                                                            | <input type="radio"/> | <input type="radio"/> | <input type="radio"/>      | <input type="radio"/> | <input type="radio"/> |
| I do confidence in government for the planning and introduction of the vaccine against malaria.                                                                        | <input type="radio"/> | <input type="radio"/> | <input type="radio"/>      | <input type="radio"/> | <input type="radio"/> |
| The vaccine was already important to me antimalarial drug before its introduction in my country.                                                                       | <input type="radio"/> | <input type="radio"/> | <input type="radio"/>      | <input type="radio"/> | <input type="radio"/> |
| I value vaccine anti-malarial, more than a year after his introduction in my country.                                                                                  | <input type="radio"/> | <input type="radio"/> | <input type="radio"/>      | <input type="radio"/> | <input type="radio"/> |

31. The malaria vaccine was included in the Burkina Expanded Programme on 5 February 2024. More than a year after its introduction, have you observed a decrease, an increase or a decrease in the use of the vaccine?  
Increase or status quo in malaria cases in children aged 5 to 17 months? \*

32. Thank you for taking part in this survey. Do you have any other comments about malaria vaccine and vaccination in the Nanoro health district?

---

This content is neither created nor endorsed by Microsoft. The data you submit will be sent to the form owner.

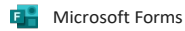

Supplement: Supplementary file 2 [file 0472fbeaa731ee6774f671e2.pdf]
