# Supplementary material
Source: Research Square preprint supplement (doi:10.21203/rs.3.rs-9727097/v1)

## Enquête : Acceptabilité du vaccin antipaludique dans le district sanitaire de Nanoro

À ce jour, deux vaccins antipaludiques, RTS,S/AS01 et R21/Matrix M, ont été approuvés par l'Organisation Mondiale de la Santé pour une utilisation dans les pays endémiques afin de prévenir le paludisme chez les enfants. Le 5 février 2024, le gouvernement burkinabè a introduit l'un de ces deux vaccins dans son Programme Élargi de Vaccination, ciblant les enfants âgés de 5 à 17 mois. En raison de la limitation des doses de vaccins, seuls 27 districts prioritaires sur un total de 70 déploient actuellement le vaccin. Cependant, pour que la vaccination contre le paludisme soit un succès, un critère important est l'acceptation du vaccin par les populations. Les agents de santé constituent l'une des principales sources d'information pour les parents lorsqu'ils décident de faire vacciner ou non leurs enfants.

Cette étude vise à évaluer l'acceptation du vaccin antipaludique chez les agents de santé dans le district sanitaire de Nanoro et à identifier les obstacles potentiels et les facteurs facilitateurs de la vaccination antipaludique dans ces groupes. Les résultats de cette étude permettront d'élaborer un plan de communication pour soutenir la vaccination en cours dans les 27 districts, ainsi que son extension aux 43 districts restants du pays.

Tous les agents de santé âgés de 18 ans et plus, actuellement employés dans le secteur public ou privé de la santé au sein du district sanitaire de Nanoro, sont éligibles pour cette étude. Cependant, seuls les agents de santé disposés à répondre au questionnaire participeront à l'étude. Nous leur poserons quelques questions sur leur avis concernant le vaccin contre le paludisme.

Le questionnaire sera anonyme et toutes les données d'identification personnelle resteront confidentielles. Seuls les résultats agrégés et anonymes de l'étude seront communiqués au district sanitaire de Nanoro et aux participants individuellement, ainsi qu'au Ministère de la Santé et de l'Hygiène Publique du Burkina Faso. Vous ne serez pas identifiable indirectement et vos réponses individuelles ne seront pas partagées intentionnellement ou accidentellement avec votre supérieur hiérarchique ou le district sanitaire de Nanoro, ni utilisées pour des évaluations professionnelles. Si vous décidez de ne pas participer à l'étude, il n'y aura aucune conséquence négative. Si vous décidez de participer à l'étude, vous pouvez cesser de le faire à tout moment, sans conséquences négatives.

Votre participation à cette étude est entièrement volontaire et vous ne recevrez pas de rémunération pour votre participation. Cependant, une compensation vous sera accordée pour couvrir vos frais de connexion Internet (1 Go). En acceptant de participer à l'étude, vous consentez à remplir le questionnaire. Le remplissage du questionnaire prendra environ 10 à 15 minutes. Veuillez répondre au questionnaire avant le 05 Mai 2025 à 23h45, s'il vous plaît.

Pour toute question, veuillez contacter Dr Jean-Vincent LAMIEN, Tél (WhatsApp) : +226 74 49 99 86, ou Email : [dofindoubel@gmail.com](mailto:dofindoubel@gmail.com) ; ou le Comité d'Éthique pour la Recherche en Santé (CERS) du Burkina Faso, Tél : +226 25 48 89 37.

### CONSENTEMENT ÉCLAIRÉ DU PARTICIPANT

1. Je comprends et j'accepte de répondre au questionnaire. \*

Oui

Non

## INFORMATIONS SOCIODÉMOGRAPHIQUES

2. Quel est votre âge, en années ? \*

- < 18
- 18-29
- 30-39
- 40-49
- 50-59
- ≥ 60

3. Quel est votre sexe? \*

- Masculin
- Féminin

4. Quel est votre niveau d'études le plus élevé ? \*

- Certificat d'Etudes Primaires (CEP)
- Brevet d'Etudes du Premier Cycle (BEPC)
- Baccalauréat (BAC)
- Licence
- Master
- Doctorat
- Other

5. Quelle est votre profession actuelle ? \*

- Médecin
- Pharmacien(ne)
- Attaché(e) de santé
- Infirmier(ère)
- Sage-femme ou maïeuticien d'État
- Aide-pharmacien(ne)
- Agent Itinerant de Santé et d'Hygiène Communautaire (AIS)
- Technicien de laboratoire
- Other

6. Quelle est votre expérience professionnelle, en années ? \*

- ≤ 5
- 6-10
- 11-15
- 16-20
- > 20

7. Dans quel type de formation sanitaire travaillez-vous ? \*

- Centre Médical avec Antenne Chirurgicale (CMA)
- Centre Médical (CM)
- Centre de Santé et de Promotion Sociale (CSPS)
- Unité de Recherche Clinique de Nanoro (URCN)
- Other

8. La formation sanitaire dans laquelle vous travaillez est-elle publique (gérée par l'État) ou privée (confessionnelle, à but lucratif ou non lucratif) ? \*

Publique

Privée

9. Quelle est votre religion ? \*

Christianisme

Islam

Animisme

Other

## CONNAISSANCES ET PERCEPTIONS DES VACCINS ANTIPALUDIQUES

10. Êtes-vous au courant de l'intégration d'un vaccin antipaludique dans le Programme Elargi de Vaccination (PEV) du pays ? \*

Oui

Non

11. Êtes-vous au courant de l'intégration d'un vaccin antipaludique dans le programme de vaccination de routine du district sanitaire de Nanoro ? \*

Oui

Non

12. Quel vaccin contre le paludisme a été introduit dans le district sanitaire de Nanoro ? \*

RTS,S/AS01

R21/Matrix M

Je ne sais pas

13. Quel est le calendrier de vaccination contre le paludisme recommandé dans le Programme Elargi de Vaccination (PEV) ? \*

3 doses à 2, 3 et 4 mois après la naissance.

3 doses à 2, 4 et 18 mois après la naissance.

4 doses à 5, 6, 7 et 15 mois après la naissance.

4 doses à 2, 3, 4 et 18 mois après la naissance.

Je ne sais pas.

14. Avez-vous reçu une formation avant l'introduction du vaccin antipaludique dans le district sanitaire de Nanoro ? \*

- Oui
- Non
- Non applicable

15. Avez-vous déjà administré le vaccin antipaludique à des enfants dans le cadre du Programme Elargi de Vaccination ? \*

- Oui
- Non

16. Indiquez votre degré d'accord avec les affirmations suivantes (1 - Tout à fait d'accord, 2 - D'accord, 3 - Ni d'accord ni en désaccord, 4 - En désaccord, 5 - Tout à fait en désaccord). \*

|                                                                                                                                               | Tout à fait d'accord  | D'accord              | Ni d'accord ni en désaccord | En désaccord          | Tout à fait en désaccord |
|-----------------------------------------------------------------------------------------------------------------------------------------------|-----------------------|-----------------------|-----------------------------|-----------------------|--------------------------|
| La vaccination contre le paludisme peut protéger les enfants âgés de 5 à 17 mois contre l'infection par le Plasmodium.                        | <input type="radio"/> | <input type="radio"/> | <input type="radio"/>       | <input type="radio"/> | <input type="radio"/>    |
| La vaccination contre le paludisme peut protéger les enfants âgés de 5 à 17 mois contre les formes graves de la maladie.                      | <input type="radio"/> | <input type="radio"/> | <input type="radio"/>       | <input type="radio"/> | <input type="radio"/>    |
| La vaccination contre le paludisme est le <b>seul moyen</b> de protéger les enfants âgés de 5 à 17 mois contre l'infection par le Plasmodium. | <input type="radio"/> | <input type="radio"/> | <input type="radio"/>       | <input type="radio"/> | <input type="radio"/>    |
| L'un des moyens de prévenir le paludisme grave chez les enfants âgés de 5 à 17 mois est la vaccination contre la maladie.                     | <input type="radio"/> | <input type="radio"/> | <input type="radio"/>       | <input type="radio"/> | <input type="radio"/>    |
| La vaccination contre le paludisme ne présente aucun intérêt pour les enfants âgés de 5 à 17 mois.                                            | <input type="radio"/> | <input type="radio"/> | <input type="radio"/>       | <input type="radio"/> | <input type="radio"/>    |

17. Indiquez votre degré d'accord avec les affirmations suivantes (1 - Tout à fait d'accord, 2 - D'accord, 3 - Ni d'accord ni en désaccord, 4 - En désaccord, 5 - Tout à fait en désaccord). \*

|                                                                                                                         | Tout à fait d'accord  | D'accord              | Ni d'accord ni en désaccord | En désaccord          | Tout à fait en désaccord |
|-------------------------------------------------------------------------------------------------------------------------|-----------------------|-----------------------|-----------------------------|-----------------------|--------------------------|
| Je m'inquiète de la sécurité du vaccin contre le paludisme.                                                             | <input type="radio"/> | <input type="radio"/> | <input type="radio"/>       | <input type="radio"/> | <input type="radio"/>    |
| Je crains que la vaccination contre le paludisme puisse entraîner des effets secondaires graves.                        | <input type="radio"/> | <input type="radio"/> | <input type="radio"/>       | <input type="radio"/> | <input type="radio"/>    |
| Je crois que les autres méthodes de prévention du paludisme sont bien meilleures que la vaccination.                    | <input type="radio"/> | <input type="radio"/> | <input type="radio"/>       | <input type="radio"/> | <input type="radio"/>    |
| Les enfants peuvent toujours contracter le paludisme même après avoir été vaccinés contre la maladie.                   | <input type="radio"/> | <input type="radio"/> | <input type="radio"/>       | <input type="radio"/> | <input type="radio"/>    |
| Les enfants n'ont pas besoin du vaccin contre le paludisme, car il existe des traitements efficaces pour cette maladie. | <input type="radio"/> | <input type="radio"/> | <input type="radio"/>       | <input type="radio"/> | <input type="radio"/>    |

## ATTITUDES ET COMPORTEMENTS À L'ÉGARD DE LA VACCINATION ANTIPALUDIQUE

18. Avez-vous des enfants (un ou plusieurs)? \*

- Oui
- Non

19. L'un de vos enfants a-t-il déjà été diagnostiqué positif au paludisme ? \*

- Oui, paludisme confirmé
- Oui, paludisme suspecté
- Non
- Je ne sais pas

20. Recommanderiez-vous à vos propres enfants et aux enfants des membres de votre famille ou de vos amis de se faire vacciner contre le paludisme ? \*

- Oui
- Non
- Je ne suis pas sûr(e)

21. Si vous avez répondu "non" ou "pas sûr" à la question précédente, quelles pourraient en être les raisons ? (Veuillez cocher toutes les cases qui s'appliquent) \*

- Je ne pense pas que le vaccin soit sûr.
- Je ne pense pas que le vaccin soit efficace pour prévenir le paludisme.
- Je n'ai pas assez d'informations sur le vaccin.
- J'ai eu des expériences négatives avec les vaccins.
- Ma religion s'oppose aux vaccins.
- Je ne fais pas confiance au gouvernement.
- Other

22. Recommanderiez-vous à vos patients de faire vacciner leurs enfants contre le paludisme ? \*

- Oui
- Non
- Je ne suis pas sûr(e)

23. Si vous avez répondu "non" ou "pas sûr" à la question précédente, quelles pourraient en être les raisons ? (cochez toutes les cases correspondantes) \*

- Je ne pense pas que le vaccin soit sûr
- Je ne pense pas que le vaccin soit efficace pour prévenir le paludisme.
- Je n'ai pas assez d'informations sur le vaccin.
- J'ai eu des expériences négatives avec les vaccins.
- Ma religion s'oppose aux vaccins.
- Je ne fais pas confiance au gouvernement.
- Other

24. Rencontrez-vous des parents qui hésitent à faire vacciner leurs enfants contre le paludisme ? \*

- Oui
- Non
- Non applicable

25. Si vous rencontriez des parents hésitants, vous sentiriez-vous à l'aise pour répondre à leurs préoccupations ? \*

- Oui
- Non
- Je ne suis pas sûr(e)

26. Quelles sont, à votre avis, les raisons les plus courantes pour lesquelles certains parents hésitent à faire vacciner leurs enfants contre le paludisme ? (Veuillez cocher toutes les réponses qui s'appliquent.) \*

- Sécurité des vaccins
- Efficacité des vaccins
- Peur des nouveaux vaccins
- Désinformation
- Nécessité de recourir à d'autres mesures de prévention
- Je ne sais pas
- Other

27. Classez vos sources d'information sur le vaccin antipaludique et la vaccination (Veuillez ranger les sources de la plus fréquente à la moins fréquente). \*

|                                                                     |
|---------------------------------------------------------------------|
| Médias sociaux (WhatsApp, Facebook, TikTok, LinkedIn, X, Instagram) |
| Radio, télévision, journaux                                         |
| Journaux scientifiques                                              |
| Lieu de travail                                                     |
| Collègues                                                           |
| Le site du Ministère de la Santé                                    |
| Le site de l'Organisation Mondiale de la Santé                      |

28. La communication avec le public est essentielle lors de l'introduction d'un nouveau vaccin. Quels sont, à votre avis, les messages clés à faire passer ? (veuillez cocher toutes les cases correspondantes) \*

- Comment prévenir le paludisme ?
- Quelle sera l'efficacité du vaccin antipaludique dans la prévention de futures infections par le plasmodium ?
- Quel est le profil de sécurité du vaccin antipaludique ?
- Le vaccin antipaludique présente-t-il des risques pour les enfants ?
- Quels sont les avantages du vaccin antipaludique?
- D'autres mesures de prévention du paludisme sont-elles nécessaires en plus du vaccin ?
- Other

29. Selon vous, quelles sont les sources les plus consultées par le public pour la communication et la sensibilisation à la vaccination antipaludique et aux informations connexes ? (Veuillez ranger les sources de la plus fréquente à la moins fréquente). \*

|                                                        |
|--------------------------------------------------------|
| Conseil direct ou promotion de la santé                |
| Journaux                                               |
| Radio                                                  |
| Télévision                                             |
| WhatsApp                                               |
| Facebook                                               |
| Autres médias sociaux (TikTok, Instagram, LinkedIn, X) |
| Affiches/dépliants/brochures                           |
| Le site web du Ministère de la Santé                   |
| Le site web de l'Organisation Mondiale de la Santé     |

## LA CONFIANCE DANS LE GOUVERNEMENT ET L'OPINION PERSONNELLE SUR L'IMPACT DE LA VACCINATION

30. Indiquez votre degré d'accord avec les affirmations suivantes (1- Tout à fait d'accord, 2- D'accord, 3- Ni d'accord ni en désaccord, 4- En désaccord, 5- Tout à fait en désaccord). \*

|                                                                                                                                                                                      | Tout à fait d'accord  | D'accord              | Ni d'accord ni en désaccord | En désaccord          | Tout à fait en désaccord |
|--------------------------------------------------------------------------------------------------------------------------------------------------------------------------------------|-----------------------|-----------------------|-----------------------------|-----------------------|--------------------------|
| Le gouvernement fournit des informations transparentes et actualisées sur le développement du vaccin contre le paludisme et son intégration dans le Programme Elargi de Vaccination. | <input type="radio"/> | <input type="radio"/> | <input type="radio"/>       | <input type="radio"/> | <input type="radio"/>    |
| Le gouvernement offre aux agents de santé une formation adéquate sur les vaccins antipaludiques et la vaccination.                                                                   | <input type="radio"/> | <input type="radio"/> | <input type="radio"/>       | <input type="radio"/> | <input type="radio"/>    |
| Je fais confiance au gouvernement pour la planification et l'introduction du vaccin contre le paludisme.                                                                             | <input type="radio"/> | <input type="radio"/> | <input type="radio"/>       | <input type="radio"/> | <input type="radio"/>    |
| J'accordais déjà de l'importance au vaccin antipaludique avant son introduction dans mon pays.                                                                                       | <input type="radio"/> | <input type="radio"/> | <input type="radio"/>       | <input type="radio"/> | <input type="radio"/>    |
| Je valorise désormais le vaccin antipaludique, plus d'un an après son introduction dans mon pays.                                                                                    | <input type="radio"/> | <input type="radio"/> | <input type="radio"/>       | <input type="radio"/> | <input type="radio"/>    |

31. Le vaccin contre le paludisme a été intégré au Programme Élargi de Vaccination au Burkina Faso le 5 février 2024. Plus d'un an après son introduction, avez-vous observé une diminution, une augmentation ou un statu quo des cas de paludisme chez les enfants âgés de 5 à 17 mois ? \*

32. Merci d'avoir participé à cette enquête. Avez-vous d'autres commentaires sur le vaccin antipaludique et la vaccination dans le district sanitaire de Nanoro ?

---

This content is neither created nor endorsed by Microsoft. The data you submit will be sent to the form owner.

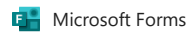

Supplement: Supplementary file 1 [file 02873926503f304f873227f7.pdf]
